# Supplementary material
Source: publisher figshare collection journal article supplement (https://karger.figshare.com/ndownloader/files/8717719)
Supplement: Supplementary file 1 [file 8717719]

Log rank p<0.001

**Fig. S1.** Kaplan-Meier estimates for renal survival by remission status.
